# Supplementary material
Source: Springer Nature journal article supplement (https://www.springermedizin.de/resource/supplementary/13075_2009_2760_MOESM4_ESM.pdf/9692822)

A

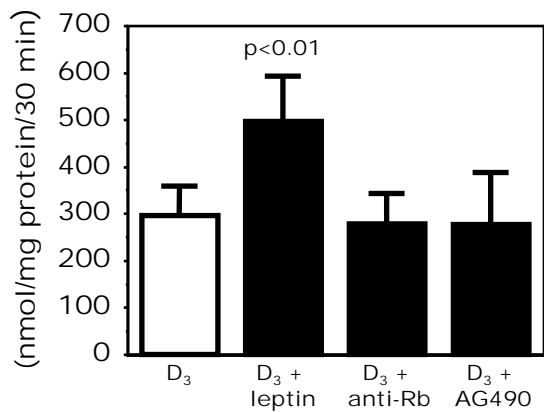

B

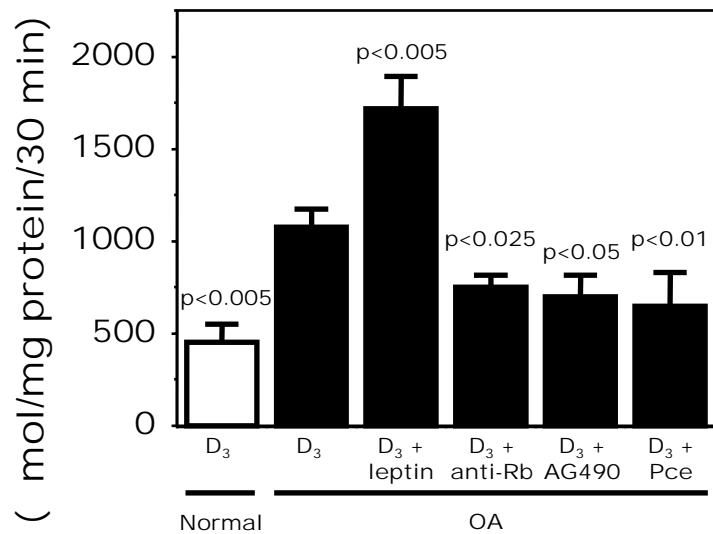

C

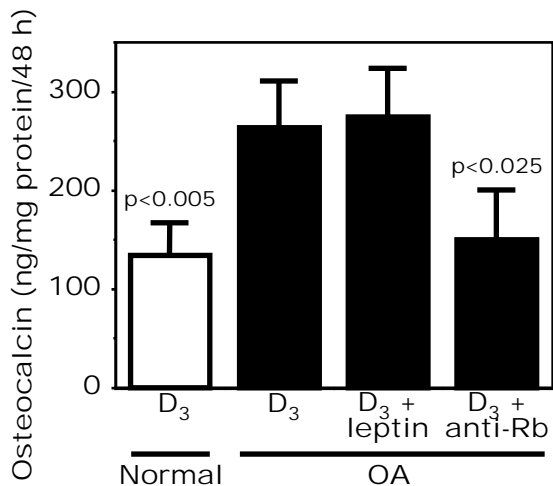

D

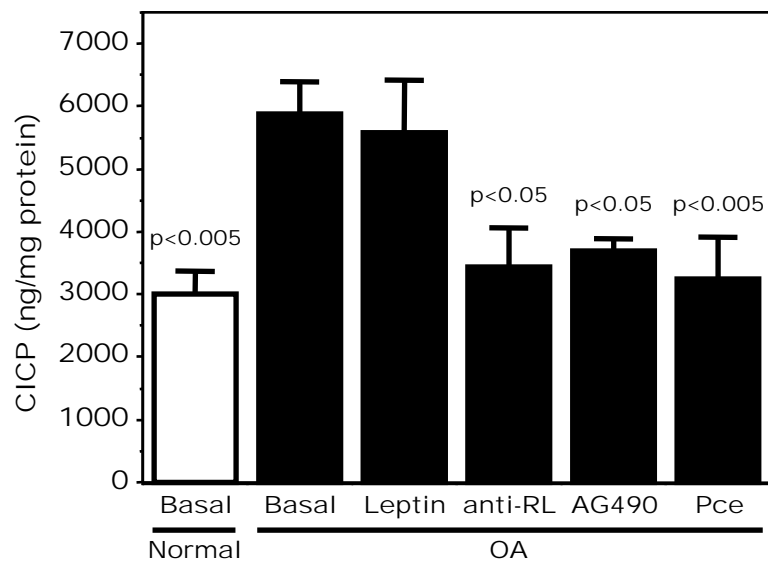

E

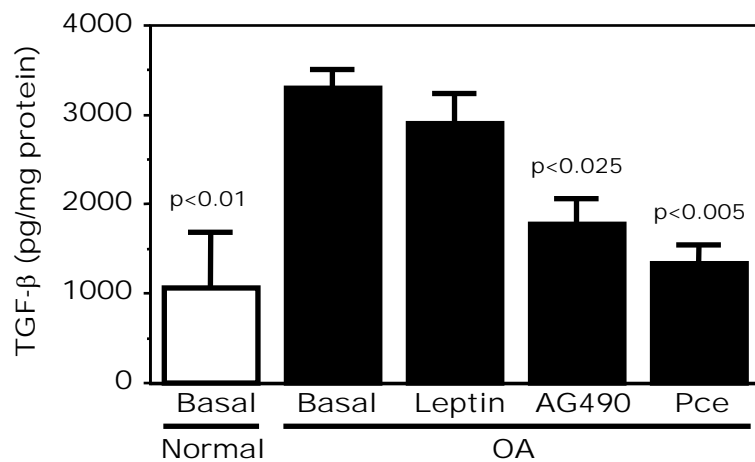

Supplement: MOESM4 [file 9692822]
